# Supplementary material
Source: PubMed Central journal article supplement (PMC7856078)

# Figure S2. Related to Figure 2.

## A Optogenetic activation of R60G08 neurons (GH $\sigma$ /♀)

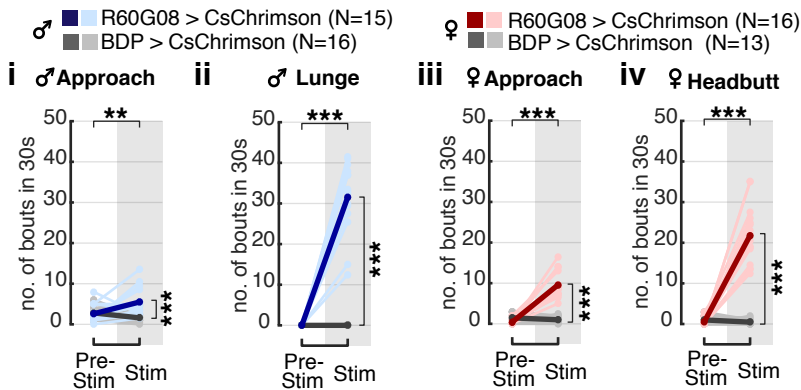

## B R60G08 Brain vs VNC anatomy

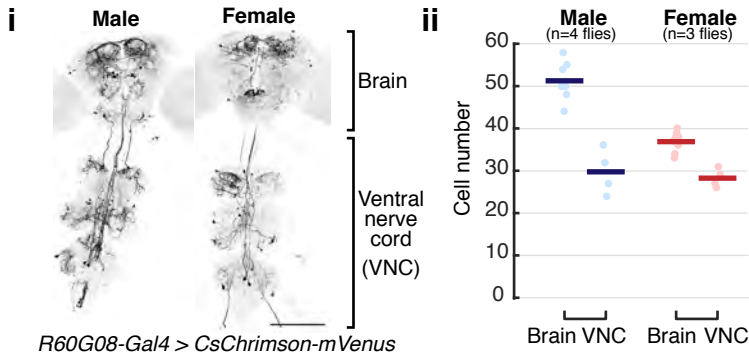

## C Activation of R60G08 $\wedge$ Brain or R60G08 $\wedge$ VNC neurons (GH $\sigma$ /♀)

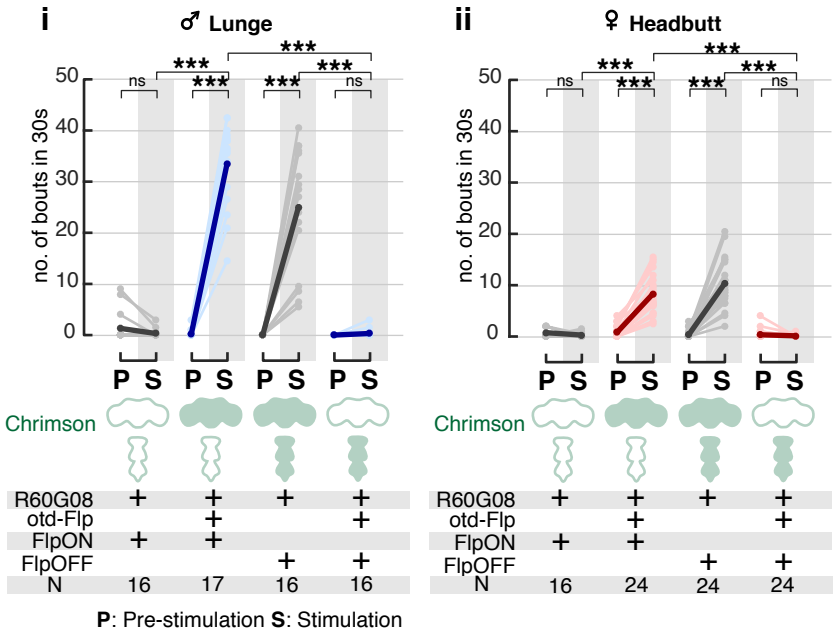

Supplement: NIHMS1651000-supplement-3.pdf [file NIHMS1651000-supplement-3.pdf]
