# Supplementary material
Source: PubMed Central journal article supplement (PMC7856078)

# Figure S7. Related to Figure 7.

## A Eb5 (CAP+MAP) ↑ & Tk ↓ (GH♂)

- Eb5 > Chrimson + Tk > Kir2.1 (N=16)
- Eb5 > Chrimson + Empty > Kir2.1 (Ctrl) (N=16)

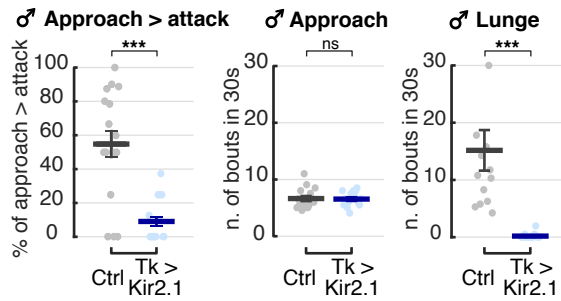

## B Tk ↑ & Eb5(CAP+MAP) ↓ (GH♂)

- Tk > Chrimson + Eb5 > Kir2.1 (N=16)
- Tk > Chrimson + Empty > Kir2.1 (Ctrl) (N=16)

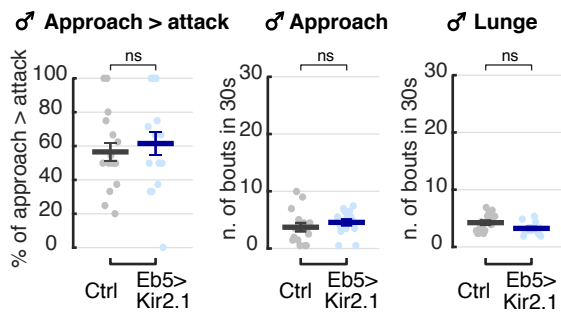

Supplement: NIHMS1651000-supplement-8.pdf [file NIHMS1651000-supplement-8.pdf]
