# Supplementary material
Source: PubMed Central journal article supplement (PMC7856078)

# Figure S1. Related to Figure 1.

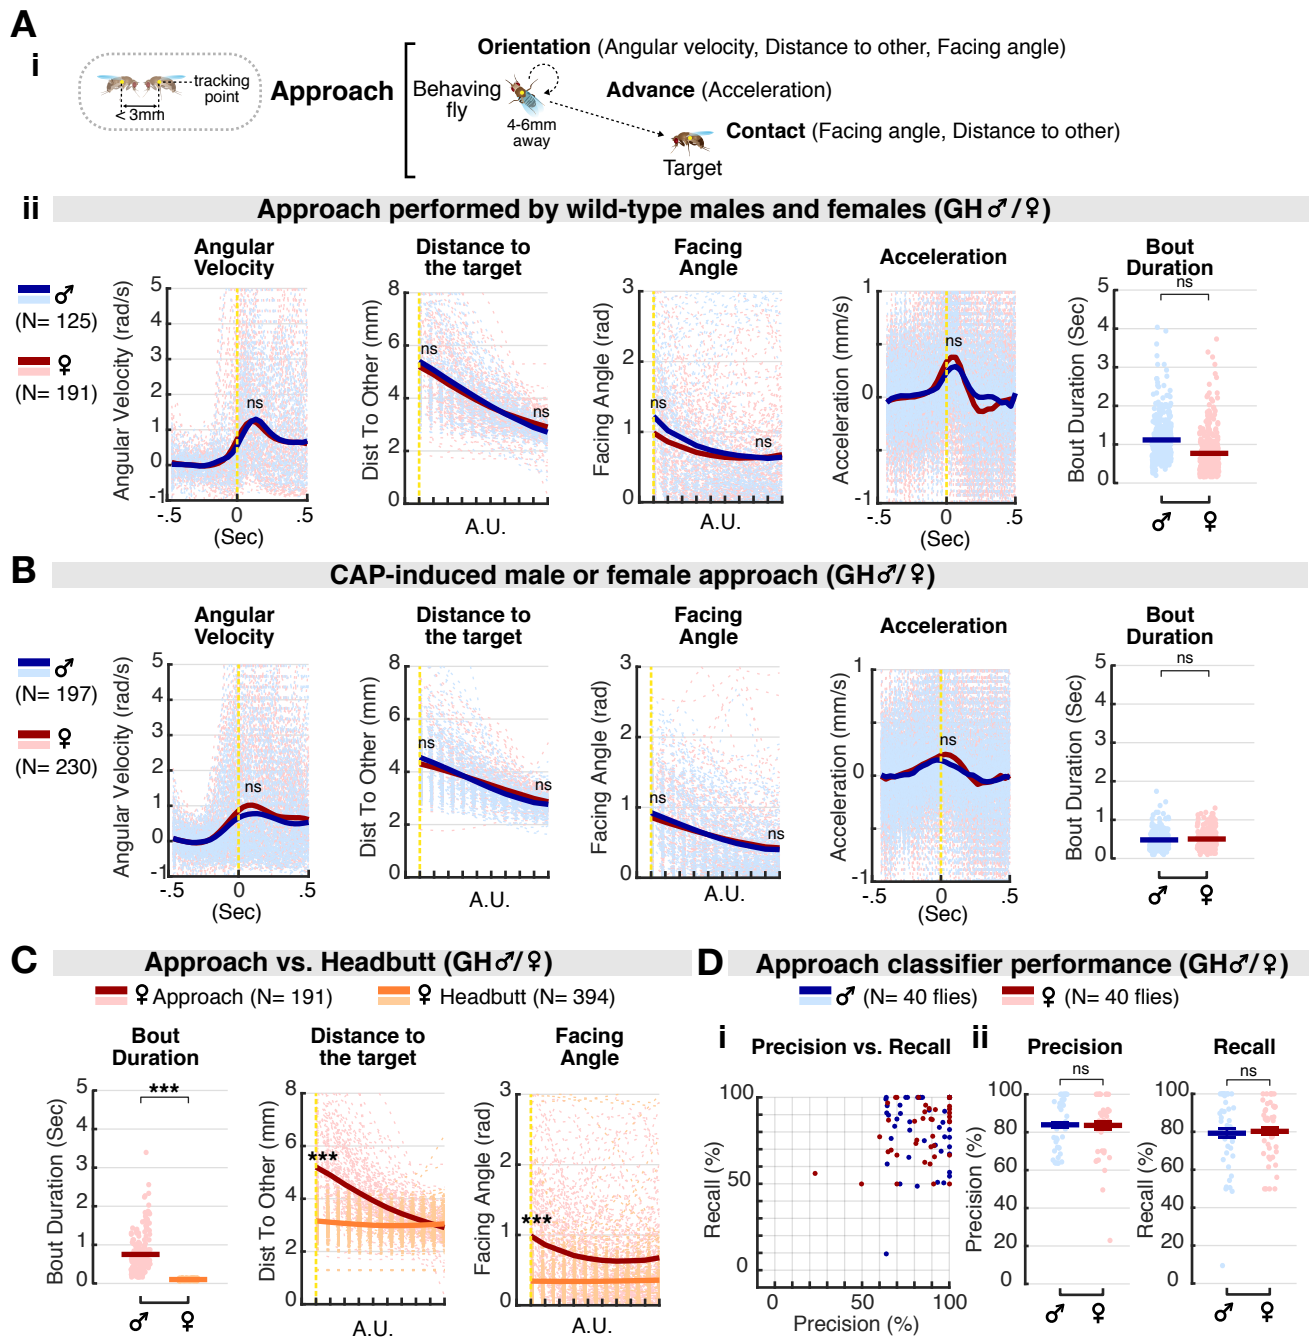

Supplement: NIHMS1651000-supplement-2.pdf [file NIHMS1651000-supplement-2.pdf]

# Figure S5. Related to Figure 3, 4, &6.

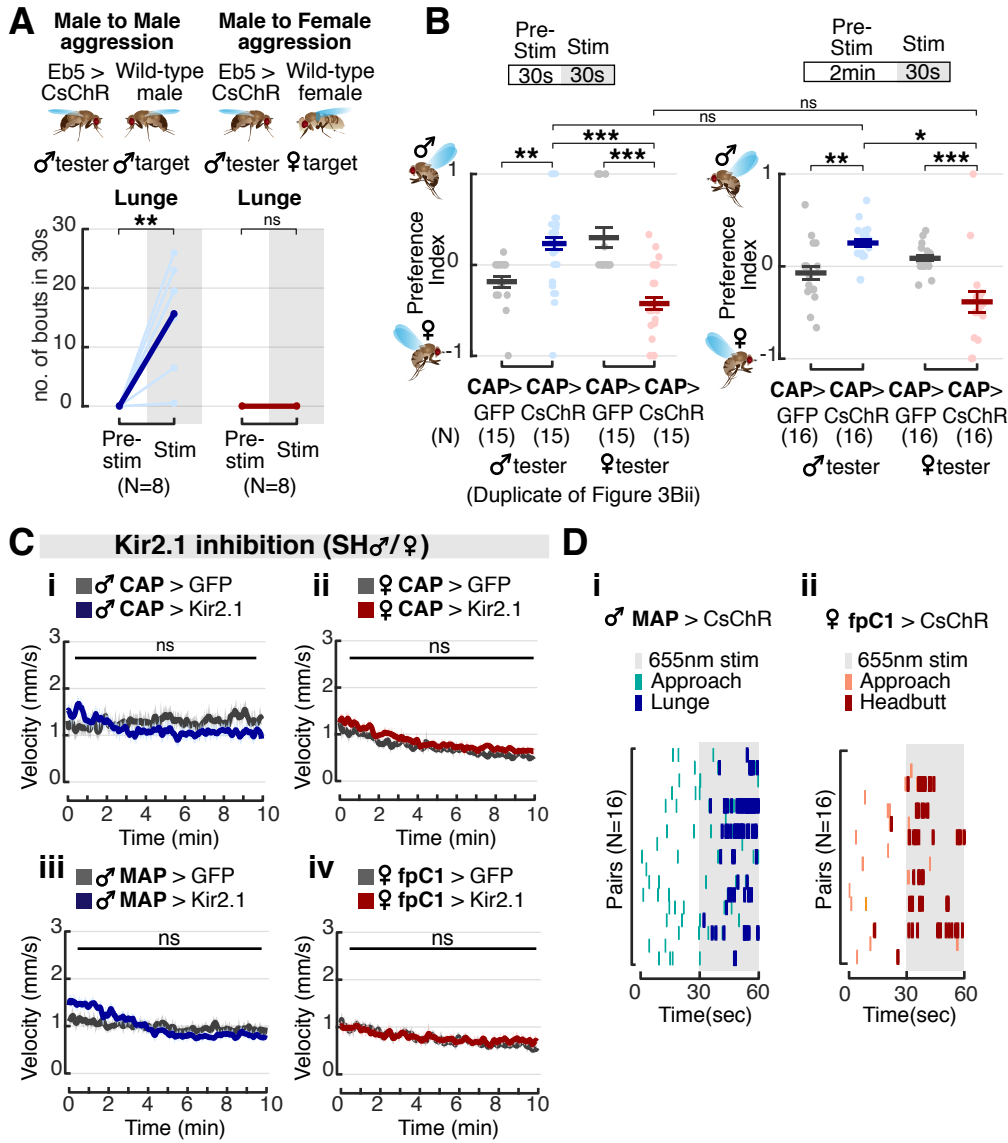

Supplement: NIHMS1651000-supplement-6.pdf [file NIHMS1651000-supplement-6.pdf]

**Figure S6. Related to Figure 7.**

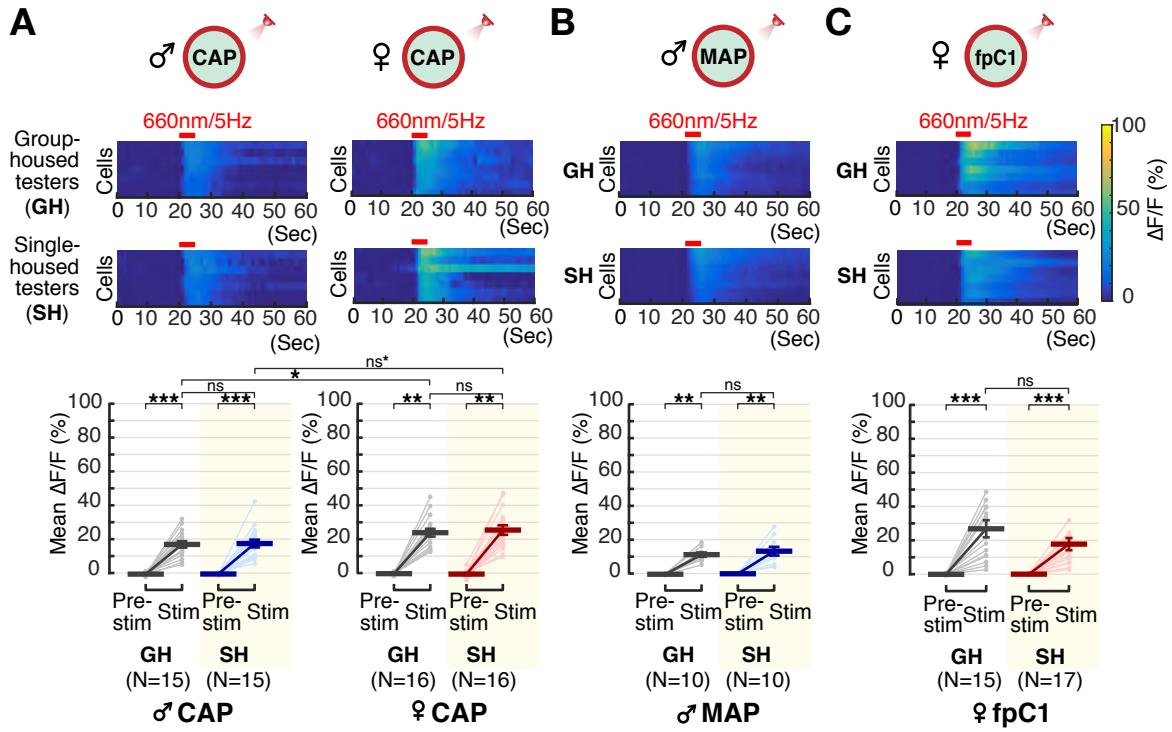

Supplement: NIHMS1651000-supplement-7.pdf [file NIHMS1651000-supplement-7.pdf]
